# Supplementary material for: Autoantibodies against the Second Extracellular Loop of M3R Do neither Induce nor Indicate Primary Sjögren’s Syndrome
Source: PubMed Central journal article supplement (PMC4765836; doi:10.1371/journal.pone.0149485), 2016-02-22
Supplement: pone.0149485.s001.pdf [file pone.0149485.s001.pdf]

## Supporting information

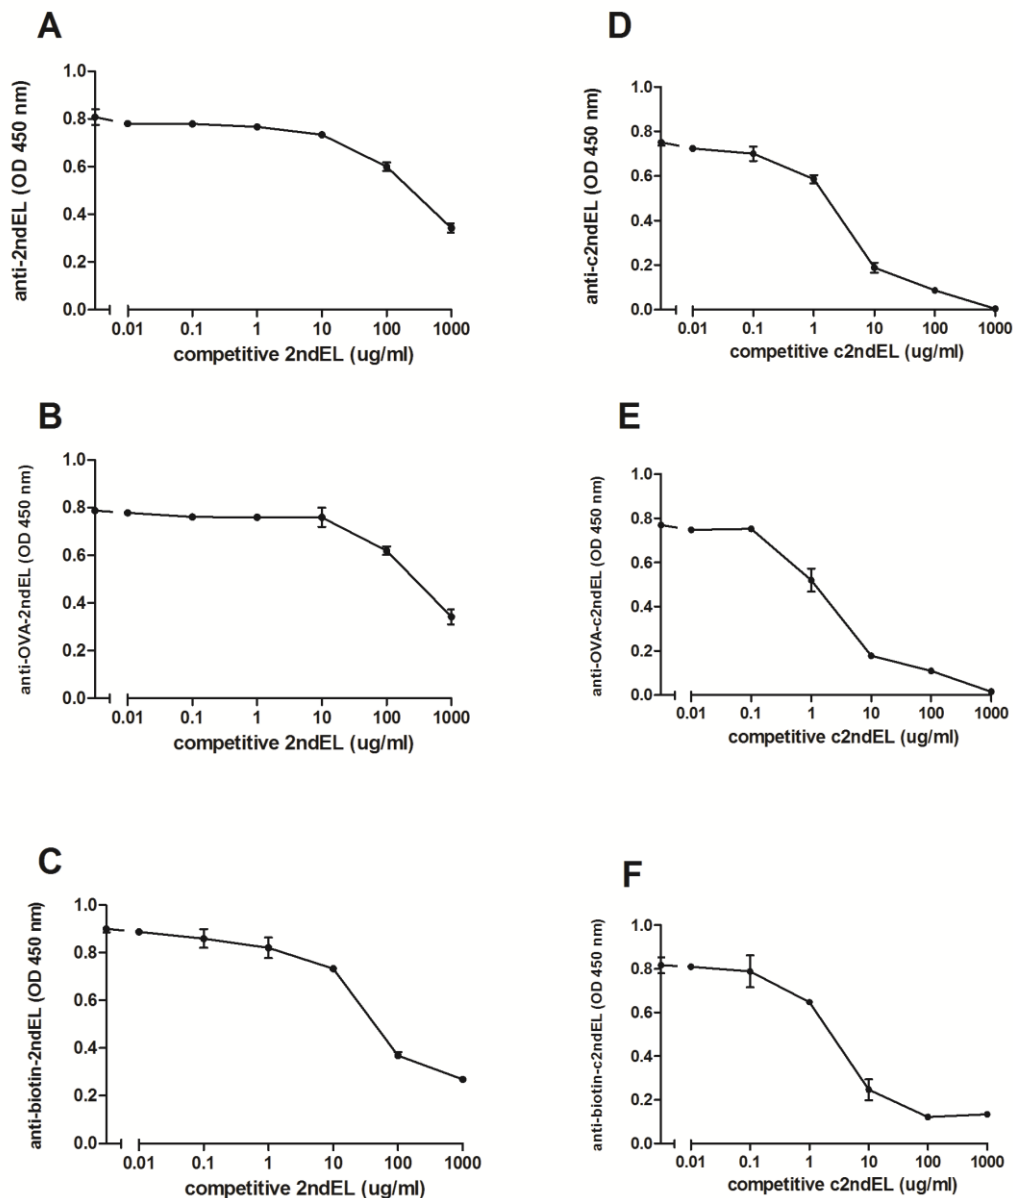

### S1 Fig. Competitive ELISA curves for detecting autoantibodies against M3R peptides.

Using 2ndEL as the competitive peptide, the specificity of the autoantibodies against 2ndEL was determined by using 2ndEL ( A ), OVA-2ndEL ( B ) or bio-2ndEL ( C ) as the coated antigen. Using c2ndEL as the competitive peptide, the specificity of the autoantibodies against c2ndEL was determined by using c2ndEL ( D ), OVA-c2ndEL ( E ) or coating bio-c2ndEL as the coated antigen ( F ).
